# Supplementary material
Source: publisher figshare collection journal article supplement (https://karger.figshare.com/ndownloader/files/39591253)

**Supplementary Figure B**: Fundus photograph of the juxtapapillary choroidal melanoma in the left eye with epicenter at 7:00 which recurred 14 months later.


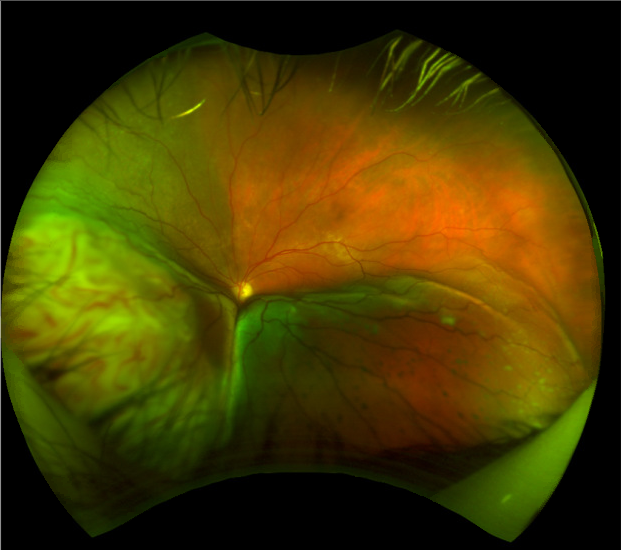

Supplement: Supplementary file 1 [file 39591253]
